# Supplementary material for: LncRNA ZNF582-AS1 Expression and Methylation in Breast Cancer and Its Biological and Clinical Implications
Source: MDPI journal article supplement (doi:10.3390/cancers14112788), 2022-06-04
Supplement: s1 [file s1]

### Supplementary Figure S1.

A. Associations between overall survival and each CpG site methylation (high versus low) in the ZNF582-AS1 promoter by Cox regression

| Probe      | Hazards ratio | P value |
|------------|---------------|---------|
| cg01772700 | 0.767         | 0.438   |
| cg24733179 | 0.652         | 0.205   |
| cg11740878 | 1.159         | 0.660   |
| cg09568464 | 1.190         | 0.602   |
| cg02763101 | 1.541         | 0.195   |
| cg22647407 | 1.182         | 0.614   |
| cg08464824 | 1.567         | 0.181   |
| cg13916740 | 1.011         | 0.973   |
| cg24039631 | 1.223         | 0.550   |
| cg20984085 | 1.354         | 0.362   |
| cg25267765 | 1.729         | 0.120   |
| cg07135042 | 1.693         | 0.127   |
| cg07778983 | 0.982         | 0.956   |

B. Associations between disease-free survival and each CpG site methylation (high versus low) in the ZNF582-AS1 promoter by Cox regression

| Probe      | Hazards ratio | P value |
|------------|---------------|---------|
| cg01772700 | 0.791         | 0.424   |
| cg24733179 | 0.893         | 0.699   |
| cg11740878 | 0.737         | 0.305   |
| cg09568464 | 1.046         | 0.879   |
| cg02763101 | 1.321         | 0.342   |
| cg22647407 | 1.150         | 0.634   |
| cg08464824 | 1.513         | 0.161   |
| cg13916740 | 1.080         | 0.794   |
| cg24039631 | 0.905         | 0.736   |
| cg20984085 | 1.463         | 0.197   |
| cg25267765 | 1.404         | 0.259   |
| cg07135042 | 1.202         | 0.530   |
| cg07778983 | 0.993         | 0.980   |

C. Associations of overall and disease-free survival with average methylation of all the CpG sites (high versus low) in the ZNF582-AS1 promoter by Cox regression

|     | Hazards ratio | P value   |
|-----|---------------|-----------|
| OS  | 1.6641        | 0.1405418 |
| DFS | 1.0473        | 0.874645  |

D. Kaplan-Meier overall survival curves by levels of ZNF582-AS1 promoter methylation (average high, mid, and low)

#### Survival: ZNF582-AS1 Methylation and OS

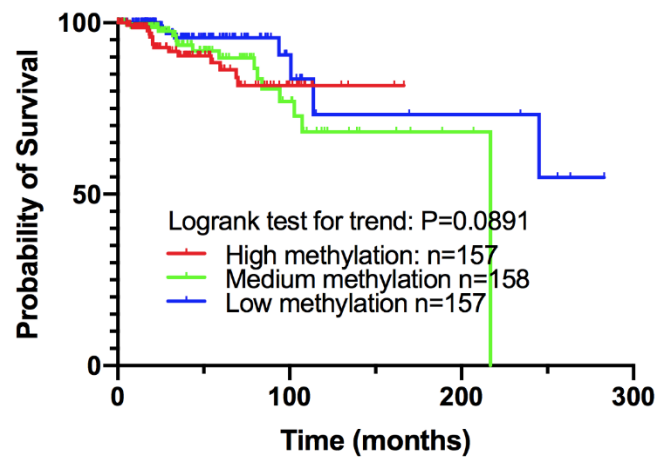

E. Kaplan-Meier disease-free survival curves by levels of ZNF582-AS1 promoter methylation (average high, mid, and low)

#### Survival: ZNF582-AS1 Methylation and DFS

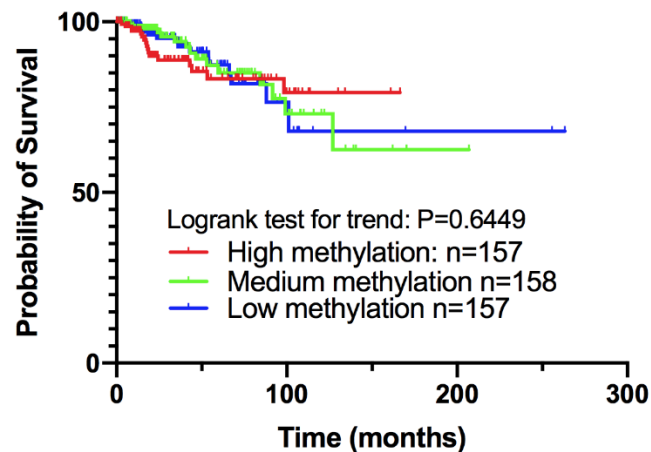

**Supplementary Figure S2. Predicted binding between has-miR-940 and PTEN mRNA**

<http://www.targetscan.org/>

|                                   | Predicted consequential pairing of target region (top) and miRNA (bottom) |
|-----------------------------------|---------------------------------------------------------------------------|
| Position 5974-5980 of PTEN 3' UTR | 5' . . . CACC UUUAGG AUUUUCUGCCUAC . . .                                  |
| hsa-miR-940                       | 3' CCCUCGCCCCCGGACGGAA                                                    |

**Supplementary Table S1. Information on GEO datasets**

| Accession ID | Chip model                           | Platforms       | No. of Patients | With OS data | With DFS data |
|--------------|--------------------------------------|-----------------|-----------------|--------------|---------------|
| GSE1456      | Affymetrix Human Genome U133 A and B | GPL96 and GPL97 | 159             | 159          | 159           |
| GSE16446     | Affymetrix U133 plus 2.0             | GPL570          | 120             | 107          | 107           |
| GSE19615     | Affymetrix U133 plus 2.0             | GPL570          | 115             | 0            | 115           |
| GSE20685     | Affymetrix U133 plus 2.0             | GPL570          | 327             | 327          | 307           |
| GSE21653     | Affymetrix U133 plus 2.0             | GPL570          | 266             | 0            | 252           |
| GSE31448     | Affymetrix U133 plus 2.0             | GPL570          | 353             | 0            | 250           |
| GSE42568     | Affymetrix U133 plus 2.0             | GPL570          | 104             | 104          | 104           |
| GSE4922      | Affymetrix Human Genome U133 A and B | GPL96 and GPL97 | 289             | 0            | 249           |
| GSE88770     | Affymetrix U133 plus 2.0             | GPL570          | 117             | 117          | 0             |
| Total        |                                      |                 | 1,850           | 814          | 1,543         |

**Supplementary Table S2. Genes in the *ZNF582-AS1* expression signature**

| <b>Gene symbol</b> | <b>Fold change</b> | <b>Adjusted p value</b> |
|--------------------|--------------------|-------------------------|
| CYP2A6             | 7.489748685        | 0.01569974              |
| GRIA1              | 4.90043538         | 0.010127825             |
| SLC14A2            | 4.630868079        | 0.001345177             |
| NCRNA00110         | 4.591525468        | 2.44877E-06             |
| SLC4A4             | 4.00503011         | 0.001946918             |
| DIRAS3             | 3.884333116        | 0.016662352             |
| C8orf34            | 3.577023615        | 0.020399521             |
| CYP4Z1             | 3.480705564        | 1.58891E-06             |
| SMYD1              | 3.34790465         | 0.003080398             |
| PIP                | 3.290811344        | 0.032983363             |
| GCM1               | 3.290140824        | 0.028260244             |
| FLJ37543           | 3.228508783        | 0.039493427             |
| DDX25              | 3.146977982        | 0.014296828             |
| CLDN19             | 3.122542923        | 1.37968E-08             |
| GRIA2              | 2.882744063        | 0.000254737             |
| COL17A1            | 2.845192173        | 1.88275E-06             |
| CMA1               | 2.824538389        | 1.59941E-09             |
| COX6B2             | 2.790800155        | 0.009040269             |
| CD207              | 2.76983469         | 0.000551065             |
| NPHS1              | 2.748531094        | 0.026031326             |
| NTF3               | 2.702277594        | 0.003708599             |
| TAC1               | 2.683219415        | 0.032415048             |
| FGF14              | 2.625928047        | 0.006018955             |
| STAB2              | 2.619950256        | 0.004092058             |
| SCN3A              | 2.56949998         | 0.013675254             |
| CST4               | 2.532061708        | 0.025436017             |
| C7                 | 2.532057704        | 2.08911E-09             |
| KIRREL3            | 2.505063536        | 0.028396331             |
| FXYP1              | 2.499628678        | 6.5228E-13              |
| CD300LG            | 2.487359017        | 1.14127E-07             |
| CNR1               | 2.484263172        | 0.002695623             |
| SLC7A3             | 2.468877676        | 1.1425E-05              |
| NOG                | 2.43194802         | 0.032092326             |
| MMP27              | 2.425174428        | 0.005692847             |
| PTGDR              | 2.420325698        | 0.001969993             |
| MYH11              | 2.419907253        | 0.00010118              |
| FIGF               | 2.410758768        | 1.59101E-05             |

|           |             |             |
|-----------|-------------|-------------|
| TMC3      | 2.40831973  | 0.028416102 |
| ZNF385D   | 2.406902308 | 1.50066E-05 |
| SEMA6D    | 2.397240195 | 0.000388638 |
| CTSG      | 2.385204312 | 4.75641E-09 |
| PLAC9P1   | 2.383016569 | 1.14882E-05 |
| GFAP      | 2.382410988 | 5.75561E-05 |
| SLC18A2   | 2.377495374 | 0.00321158  |
| FOSB      | 2.370004152 | 9.64797E-07 |
| NPY5R     | 2.366376286 | 0.005931518 |
| VIPR2     | 2.365223438 | 0.00385179  |
| SCARA5    | 2.358879282 | 1.85023E-06 |
| FCER1A    | 2.348894806 | 1.02454E-12 |
| PCAT18    | 2.315122907 | 2.08525E-08 |
| PAK7      | 2.307388239 | 8.51001E-08 |
| ZNF385B   | 2.304842865 | 2.56893E-06 |
| SLC16A12  | 2.299123189 | 0.000862141 |
| ABCA8     | 2.295845087 | 8.33476E-11 |
| CCDC108   | 2.295018996 | 2.49299E-05 |
| NDP       | 2.279616676 | 0.001780493 |
| ABCA10    | 2.269606101 | 2.37392E-10 |
| SCUBE2    | 2.264033879 | 8.14516E-10 |
| IGFN1     | 2.262824443 | 0.001195826 |
| SCN3B     | 2.259963451 | 1.03022E-05 |
| OGN       | 2.253203302 | 0.000750242 |
| C14orf180 | 2.249363925 | 5.0777E-05  |
| GLYAT     | 2.24598081  | 0.000146759 |
| TMEM132C  | 2.241472767 | 6.05356E-08 |
| RERGL     | 2.23310385  | 0.001396149 |
| CASP12    | 2.227823271 | 7.05722E-10 |
| BLK       | 2.225792769 | 0.044018246 |
| C5orf38   | 2.225508384 | 2.5073E-06  |
| ZNF582    | 2.224584785 | 1.26331E-87 |
| CD1A      | 2.216180509 | 0.009320869 |
| NTRK2     | 2.204780562 | 0.000180034 |
| SDPR      | 2.196074348 | 4.3755E-12  |
| ADH1A     | 2.189986323 | 0.000110082 |
| AK5       | 2.187157439 | 4.62641E-07 |
| HEPN1     | 2.183845429 | 1.89767E-05 |
| GP2       | 2.180619488 | 0.017834276 |
| DARC      | 2.163632861 | 8.45267E-11 |

|           |             |             |
|-----------|-------------|-------------|
| SSTR1     | 2.161870812 | 0.00419041  |
| OXTR      | 2.150387525 | 0.000114189 |
| CARMN     | 2.148274249 | 1.56758E-09 |
| SLC14A1   | 2.148046851 | 0.019976688 |
| PYDC1     | 2.14773931  | 0.002505426 |
| CDH20     | 2.146896394 | 4.98415E-05 |
| UMOD      | 2.143085079 | 0.000119803 |
| ZBTB16    | 2.142899088 | 3.09925E-05 |
| DLX2      | 2.141589051 | 0.00139153  |
| SLC1A1    | 2.134904785 | 2.34401E-05 |
| SCN7A     | 2.134410878 | 4.78668E-08 |
| SCN2B     | 2.132955293 | 2.74488E-09 |
| LCN10     | 2.131713118 | 0.003042708 |
| KCNA1     | 2.130988187 | 0.000867263 |
| SLC26A5   | 2.128189454 | 2.81657E-06 |
| CIDEC     | 2.127218862 | 8.81386E-05 |
| NEK10     | 2.12584836  | 3.88655E-09 |
| SGCA      | 2.121865627 | 0.004271255 |
| TNXB      | 2.114644829 | 6.61491E-10 |
| FAM196B   | 2.112059721 | 0.013002919 |
| SHROOM1   | 2.108625919 | 1.57244E-06 |
| GRIA4     | 2.108386585 | 0.006080956 |
| FGF10     | 2.103119426 | 0.029708617 |
| SRL       | 2.101930923 | 0.002838761 |
| CACNB2    | 2.090727145 | 0.014221225 |
| C2orf73   | 2.085637672 | 8.17834E-08 |
| CYP4X1    | 2.082874264 | 6.8775E-07  |
| SLC6A4    | 2.073442717 | 0.017241094 |
| CLEC17A   | 2.072342844 | 0.018500949 |
| SORCS1    | 2.070192175 | 0.000355623 |
| AQP7P1    | 2.065551703 | 0.000410275 |
| FCGBP     | 2.063003289 | 2.16647E-05 |
| HBB       | 2.057950809 | 0.000199876 |
| FAM180B   | 2.053380077 | 0.000589928 |
| TRHDE-AS1 | 2.052965321 | 0.004633239 |
| CDH22     | 2.044671665 | 0.028608839 |
| LEP       | 2.040471613 | 0.005644831 |
| CACNA2D3  | 2.038840327 | 0.002853203 |
| ANGPTL1   | 2.038629565 | 1.68317E-09 |
| C9orf68   | 2.037050988 | 9.17247E-14 |

|           |             |             |
|-----------|-------------|-------------|
| SERPINA11 | 2.035253614 | 8.74941E-07 |
| C10orf107 | 2.032939216 | 2.51369E-05 |
| GALNT5    | 2.031427692 | 0.002343196 |
| NTRK3     | 2.02132064  | 0.003842384 |
| ADRA1A    | 2.016207639 | 0.001390121 |
| CYP4A11   | 2.015127567 | 0.034985304 |
| IGFALS    | 2.014087092 | 8.23325E-05 |
| ADH1B     | 2.011322017 | 0.000111455 |
| AJAP1     | 2.008582344 | 0.043680166 |
| CASQ2     | 2.007719841 | 2.1818E-05  |
| EFCAB1    | 2.003565549 | 0.018682497 |
| LRP2      | 1.999337886 | 0.000458985 |
| FREM1     | 1.998234354 | 5.44504E-09 |
| NAT1      | 1.997172267 | 6.75176E-07 |
| GPD1      | 1.994584616 | 0.000110343 |
| CCL14     | 1.989179411 | 4.85574E-10 |
| KRT8P41   | 1.988979448 | 3.25957E-06 |
| PLIN1     | 1.983916435 | 7.22328E-05 |
| HSPB7     | 1.978152077 | 0.000109404 |
| ADAM33    | 1.978136017 | 5.87217E-13 |
| ANGPT4    | 1.972643602 | 1.15329E-05 |
| HPSE2     | 1.969304448 | 0.040291905 |
| SPATA4    | 1.96743412  | 1.53087E-08 |
| SLC22A11  | 1.96630769  | 2.98398E-05 |
| ZNF471    | 1.960021908 | 1.87955E-26 |
| MAP1LC3C  | 1.95762162  | 2.15467E-05 |
| IL1RL1    | 1.957000308 | 5.23237E-05 |
| NTN4      | 1.955538008 | 9.1046E-17  |
| GPIHBP1   | 1.948961302 | 2.30655E-11 |
| SCN4B     | 1.948872003 | 1.64111E-15 |
| ABCB5     | 1.948831811 | 0.002296421 |
| CACNA1F   | 1.946082794 | 3.14446E-07 |
| KCNE1     | 1.944932548 | 0.000106133 |
| C8orf79   | 1.940224085 | 6.32358E-12 |
| TPO       | 1.937338133 | 7.30278E-09 |
| ZNF677    | 1.933273828 | 3.47878E-19 |
| RD3       | 1.930193074 | 0.000994203 |
| ADAMTS8   | 1.92728786  | 0.002953493 |
| MFAP4     | 1.925469856 | 1.12379E-12 |
| LTF       | 1.924948128 | 0.005299654 |



|            |             |             |
|------------|-------------|-------------|
| CCL21      | 1.923370661 | 0.000468221 |
| PI16       | 1.920953063 | 0.002753447 |
| NPY1R      | 1.92041721  | 0.016324627 |
| COL4A6     | 1.919294378 | 0.006273563 |
| CNN1       | 1.915434054 | 9.6944E-12  |
| NXNL2      | 1.913168904 | 2.34746E-07 |
| C8orf84    | 1.911381596 | 6.35362E-05 |
| CIDEA      | 1.910941253 | 0.00814828  |
| PAMR1      | 1.910020126 | 1.12404E-11 |
| PTPRT      | 1.908880149 | 4.71354E-08 |
| ADIPOQ     | 1.908779985 | 0.00037854  |
| B3GALT1    | 1.908345335 | 0.002398414 |
| CYBRD1     | 1.905798242 | 7.02396E-14 |
| KCNIP2     | 1.905042834 | 1.83884E-05 |
| GRM4       | 1.902757929 | 0.000461249 |
| EGR1       | 1.897054364 | 1.6987E-09  |
| FOS        | 1.895886117 | 1.28078E-08 |
| LRRC48     | 1.890461683 | 4.90091E-11 |
| GATA1      | 1.889227237 | 3.09378E-06 |
| PGM5       | 1.886945227 | 2.68442E-07 |
| TMEM26     | 1.884732551 | 2.95111E-07 |
| PLAC9      | 1.882251798 | 8.58261E-11 |
| CLEC9A     | 1.881028379 | 1.32195E-07 |
| IRX2       | 1.880037398 | 7.15308E-08 |
| MASP1      | 1.877602738 | 0.005773288 |
| EGR3       | 1.876774054 | 1.43467E-07 |
| SIGLEC15   | 1.872901686 | 0.000423145 |
| MYOM1      | 1.872548571 | 0.003142649 |
| NCRNA00093 | 1.870445382 | 3.72555E-07 |
| SELP       | 1.869836443 | 9.49757E-10 |
| AVPR2      | 1.867689923 | 2.46385E-10 |
| IL33       | 1.867600979 | 1.57547E-07 |
| SCGB1D2    | 1.862763133 | 0.016565341 |
| TPSB2      | 1.85392651  | 6.86324E-06 |
| CBLN4      | 1.851797001 | 1.58917E-09 |
| KCNQ5      | 1.851241271 | 0.000615349 |
| ABCA9      | 1.850538991 | 2.40634E-09 |
| CD1C       | 1.849273087 | 2.31796E-07 |
| TP63       | 1.846158888 | 1.3983E-06  |
| CDO1       | 1.846019646 | 4.17746E-07 |

|           |             |             |
|-----------|-------------|-------------|
| MYOCD     | 1.845482476 | 0.028748947 |
| CCL19     | 1.843873383 | 0.001833539 |
| MIR205HG  | 1.842038906 | 5.21351E-06 |
| MMRN1     | 1.841180322 | 4.62269E-06 |
| ITIH3     | 1.841137701 | 6.68782E-05 |
| BMX       | 1.840788974 | 2.47604E-08 |
| HEPACAM2  | 1.838233591 | 0.006776373 |
| C6        | 1.837742478 | 0.005384014 |
| ATOH8     | 1.837696014 | 3.09933E-08 |
| CX3CR1    | 1.837279263 | 6.7835E-09  |
| TPSAB1    | 1.837240534 | 1.6046E-07  |
| AQP7      | 1.836352328 | 0.000530037 |
| TACR1     | 1.832858449 | 0.000258548 |
| CYP4Z2P   | 1.832828478 | 2.39259E-05 |
| CCDC65    | 1.83254029  | 0.000773206 |
| MUSTN1    | 1.830959569 | 0.000117686 |
| PLAT      | 1.830017596 | 0.001535571 |
| RASGRP2   | 1.829125294 | 0.00670412  |
| COL14A1   | 1.827649828 | 1.70506E-09 |
| DNASE1L3  | 1.824731622 | 4.62518E-05 |
| MAPT-AS1  | 1.823556624 | 5.71567E-05 |
| CDHR3     | 1.823458564 | 0.023352691 |
| CAPN8     | 1.819305801 | 4.06038E-07 |
| TMEM47    | 1.819226729 | 0.000490965 |
| TPSD1     | 1.816792342 | 0.041160788 |
| HSD17B13  | 1.815349724 | 0.000189561 |
| TRIM63    | 1.807962091 | 0.047329253 |
| ROBO2     | 1.80742478  | 0.014551634 |
| SCUBE1    | 1.806316948 | 0.004010804 |
| GIPC2     | 1.806181623 | 2.74488E-09 |
| NOSTRIN   | 1.806081128 | 6.28047E-15 |
| CDH12     | 1.80568275  | 0.005097352 |
| ZNF542    | 1.80503195  | 1.7483E-48  |
| LINC00926 | 1.804956653 | 0.022006404 |
| ZNF238    | 1.803253501 | 5.7224E-09  |
| LRRC2     | 1.802283934 | 1.93131E-06 |
| KIF13B    | 1.800983578 | 2.10312E-18 |
| PTCH2     | 1.800092019 | 1.6987E-09  |
| INMT      | 1.798589352 | 8.40966E-11 |
| TSPAN7    | 1.796964065 | 5.63941E-12 |

|          |             |             |
|----------|-------------|-------------|
| MAMDC2   | 1.796661687 | 5.88185E-08 |
| SIGLEC6  | 1.795670373 | 3.17363E-06 |
| PDK4     | 1.79012926  | 2.71646E-06 |
| CLDN5    | 1.787827778 | 4.6246E-11  |
| CCDC74A  | 1.786252069 | 0.000301179 |
| PM20D1   | 1.785578098 | 2.1173E-06  |
| DBX2     | 1.785383164 | 1.23398E-08 |
| ZNF154   | 1.780223966 | 4.29152E-09 |
| SAMD5    | 1.779634496 | 0.000251204 |
| SIGLECP3 | 1.777097355 | 7.54602E-09 |
| PCK1     | 1.774724077 | 0.003984067 |
| GRIK5    | 1.774714683 | 0.000432239 |
| CHRD1    | 1.77343003  | 5.99806E-06 |
| FHL5     | 1.773414558 | 2.24259E-07 |
| DNASE2B  | 1.771201605 | 0.012313682 |
| MS4A2    | 1.771156804 | 5.61672E-07 |
| SLC8A3   | 1.770638368 | 2.05689E-07 |
| PHYHD1   | 1.769629429 | 1.59257E-12 |
| PDZK1    | 1.768944032 | 0.003139236 |
| C4A      | 1.765834272 | 7.03984E-10 |
| C11orf53 | 1.761073246 | 0.005760935 |
| ZNF667   | 1.758845481 | 1.7306E-13  |
| THSD7B   | 1.758083103 | 1.04337E-07 |
| ITGA7    | 1.756702309 | 1.09026E-07 |
| RGS13    | 1.749389558 | 0.00042431  |
| ABCB1    | 1.74847205  | 1.08701E-10 |
| LRRC3B   | 1.748392106 | 0.028427358 |
| SYT9     | 1.747453769 | 1.12627E-06 |
| NCAM1    | 1.746120449 | 0.019019719 |
| C4orf31  | 1.746044553 | 0.001333151 |
| ENTPD5   | 1.74390431  | 0.000910419 |
| LRRN4CL  | 1.742215124 | 1.62127E-10 |
| KLF15    | 1.740670304 | 1.73468E-05 |
| SUSD3    | 1.738550408 | 1.27648E-08 |
| TFF1     | 1.737407636 | 0.010935488 |
| ELN      | 1.736137484 | 0.000305782 |
| IGF1     | 1.733355091 | 8.16726E-09 |
| FST      | 1.731619092 | 0.015983361 |
| PDZK1P1  | 1.723814092 | 0.018727159 |
| TPRG1    | 1.721326261 | 0.002354847 |

|          |             |             |
|----------|-------------|-------------|
| TP53AIP1 | 1.71903048  | 2.2619E-05  |
| ATRNL1   | 1.717846301 | 0.047598838 |
| HBA2     | 1.715735569 | 0.00050114  |
| NHLRC4   | 1.714087266 | 4.81006E-07 |
| FAM81B   | 1.712925789 | 0.033472725 |
| KEL      | 1.712113868 | 0.008792575 |
| RTN1     | 1.709886155 | 2.04652E-05 |
| TMEM232  | 1.709300095 | 0.000143212 |
| ST8SIA6  | 1.709274357 | 6.472E-10   |
| BTNL9    | 1.706104351 | 1.32273E-08 |
| ANKRD43  | 1.705969513 | 0.000665373 |
| FGD3     | 1.703196341 | 4.58982E-08 |
| WDR65    | 1.701673999 | 4.2349E-07  |
| CACNA1D  | 1.699331034 | 3.66822E-11 |
| RAI2     | 1.699047138 | 6.91836E-11 |
| CD1E     | 1.696859186 | 5.52416E-05 |
| NGFR     | 1.693001891 | 1.73658E-05 |
| NLGN1    | 1.692640463 | 0.019669453 |
| CCR6     | 1.692237035 | 0.008857912 |
| KCND3    | 1.692234432 | 2.63698E-06 |
| PSD3     | 1.688943308 | 2.13092E-07 |
| HLA-DQB2 | 1.687789198 | 0.001811646 |
| C7orf63  | 1.686645526 | 1.42151E-11 |
| HSPB6    | 1.686561664 | 0.000113191 |
| IGSF21   | 1.685770685 | 0.000239607 |
| ITIH5    | 1.684935137 | 1.39943E-07 |
| HOXA2    | 1.684604959 | 0.000490457 |
| ABAT     | 1.683904938 | 4.68318E-10 |
| APOF     | 1.683756122 | 0.001526721 |
| NEFL     | 1.68261153  | 0.003094823 |
| GP1BA    | 1.681091852 | 0.012706005 |
| F10      | 1.678454817 | 7.23656E-11 |
| ZIK1     | 1.678158323 | 1.0027E-05  |
| HOXA5    | 1.677657458 | 0.00062012  |
| HLF      | 1.67687971  | 5.17746E-05 |
| PLD4     | 1.676259466 | 5.54447E-10 |
| MAB21L1  | 1.675628565 | 2.83119E-09 |
| CLDN11   | 1.675285289 | 4.52722E-07 |
| C1orf150 | 1.674137205 | 0.00060033  |
| FGF2     | 1.671525416 | 0.001852354 |

|           |             |             |
|-----------|-------------|-------------|
| DLEC1     | 1.669967114 | 0.000266579 |
| ZSCAN1    | 1.668827856 | 6.10483E-06 |
| GJA1      | 1.668362117 | 0.000474089 |
| C6orf217  | 1.668344131 | 4.20018E-08 |
| NEFM      | 1.666783617 | 0.027069861 |
| CFP       | 1.665611493 | 7.55557E-05 |
| SCG5      | 1.65628932  | 0.020752145 |
| UBXN10    | 1.65594222  | 1.42151E-11 |
| DLK2      | 1.655257675 | 0.000409259 |
| P2RY12    | 1.653428737 | 1.64378E-07 |
| HOXA7     | 1.650587238 | 0.030034755 |
| PLIN4     | 1.649341543 | 0.009886519 |
| CYP21A2   | 1.645772968 | 1.56871E-06 |
| MAGI2     | 1.644608435 | 0.00354302  |
| GLI1      | 1.643103697 | 2.9149E-07  |
| LOC93429  | 1.642730395 | 0.034593512 |
| TUSC5     | 1.642640894 | 0.040620048 |
| MAK       | 1.641750651 | 2.15866E-05 |
| GRRP1     | 1.640907975 | 1.38626E-09 |
| LMOD1     | 1.640636001 | 9.66379E-11 |
| STK32B    | 1.637459936 | 1.28045E-05 |
| MYOM3     | 1.635023063 | 0.016662352 |
| TSLP      | 1.634807672 | 0.000763558 |
| PTPN5     | 1.631627421 | 0.000978002 |
| LTC4S     | 1.626535163 | 9.6944E-12  |
| LINC00965 | 1.626519603 | 7.88078E-10 |
| SPARCL1   | 1.626101258 | 1.025E-15   |
| CPA3      | 1.625974263 | 8.90795E-05 |
| SLC40A1   | 1.621857339 | 1.06494E-05 |
| C15orf51  | 1.621728665 | 5.08929E-08 |
| ZFP36     | 1.621453703 | 3.63221E-08 |
| TMEM84    | 1.621286319 | 0.000274558 |
| GEM       | 1.620927888 | 1.69583E-09 |
| ADAMTS19  | 1.620259137 | 0.010131919 |
| CD22      | 1.619987066 | 0.009237106 |
| TNN       | 1.619884352 | 4.56971E-06 |
| RHOXF1    | 1.619706744 | 0.003528083 |
| PRAG1     | 1.616889253 | 5.23393E-12 |
| EGR2      | 1.616679416 | 1.2649E-06  |
| PRKACB    | 1.614624521 | 0.018387599 |

|              |             |             |
|--------------|-------------|-------------|
| SETBP1       | 1.613035619 | 1.38619E-14 |
| LIPE         | 1.612930787 | 0.000124066 |
| ENPP5        | 1.612848709 | 5.11144E-05 |
| C21orf15     | 1.612309904 | 0.013253566 |
| VWA2         | 1.60894536  | 1.62041E-08 |
| FANK1        | 1.608675905 | 9.69077E-12 |
| ASPA         | 1.607611641 | 1.00245E-06 |
| AQP1         | 1.606539536 | 8.59856E-11 |
| ABCA6        | 1.605385029 | 4.49553E-09 |
| RDH5         | 1.604457346 | 0.00075918  |
| FLJ42875     | 1.603856105 | 0.005278587 |
| C18orf34     | 1.603847163 | 0.028947453 |
| TSSK1B       | 1.603466253 | 1.2879E-07  |
| FAM13C       | 1.603303007 | 1.8052E-10  |
| COL6A6       | 1.599931693 | 0.002479424 |
| VSIG2        | 1.599473298 | 0.022615131 |
| DNAH7        | 1.599084452 | 4.4689E-08  |
| PREX2        | 1.59787086  | 2.17431E-08 |
| KIT          | 1.597235358 | 0.001911511 |
| HPGDS        | 1.596037912 | 1.2732E-11  |
| NCRNA00086   | 1.594858818 | 1.25021E-05 |
| HOXA6        | 1.594552493 | 0.004381173 |
| PTGDS        | 1.593925603 | 0.003409654 |
| PDGFD        | 1.591306424 | 2.75896E-14 |
| FRMD1        | 1.589429237 | 0.001866161 |
| ZNF835       | 1.589169567 | 1.16775E-08 |
| FABP4        | 1.587989217 | 0.016427314 |
| TTC16        | 1.587467386 | 7.77568E-05 |
| SCN4A        | 1.585789384 | 2.8631E-06  |
| ITGB3        | 1.585692205 | 0.040430963 |
| C19orf36     | 1.58555242  | 1.26052E-09 |
| FHL1         | 1.585266099 | 9.69461E-05 |
| FAM162B      | 1.584267519 | 2.21089E-11 |
| ATP1B2       | 1.58391666  | 1.94505E-08 |
| PDZRN3       | 1.583537467 | 1.0792E-10  |
| TLR10        | 1.583303138 | 0.010879394 |
| PDE1C        | 1.580947404 | 0.041072453 |
| PON3         | 1.580923621 | 0.020496956 |
| KCNS2        | 1.580349021 | 2.15731E-05 |
| LOC100129534 | 1.580257528 | 3.12312E-14 |

|            |             |             |
|------------|-------------|-------------|
| PER1       | 1.580080705 | 1.68317E-09 |
| CSRNP3     | 1.579530823 | 0.000143192 |
| DPT        | 1.579042235 | 4.16272E-07 |
| WNT9B      | 1.577708741 | 1.06043E-07 |
| ASAH1      | 1.577453245 | 7.03637E-09 |
| CASC1      | 1.576173735 | 4.22959E-06 |
| PRICKLE4   | 1.572566772 | 5.67877E-09 |
| GLIPR1L2   | 1.572463681 | 2.25047E-07 |
| PELI2      | 1.57209653  | 1.0792E-10  |
| DCDC1      | 1.569331849 | 5.22544E-05 |
| LINC02731  | 1.569141119 | 0.001579467 |
| ZNF671     | 1.567171352 | 3.16525E-11 |
| ADCYAP1R1  | 1.566258922 | 0.011389667 |
| ZNF578     | 1.56584833  | 1.56994E-07 |
| KLHL29     | 1.565470654 | 4.98267E-06 |
| CDK15      | 1.564883603 | 7.97428E-06 |
| GRP        | 1.564490593 | 5.65549E-06 |
| EBF2       | 1.563181008 | 1.00692E-08 |
| AOC3       | 1.563121474 | 2.25836E-07 |
| IQGAP2     | 1.563120357 | 7.54602E-09 |
| USHBP1     | 1.562269305 | 8.5277E-12  |
| DYNC2H1    | 1.561965406 | 2.7523E-12  |
| NGF        | 1.56131804  | 0.037965645 |
| ASTN1      | 1.561294826 | 0.03663488  |
| LAMA2      | 1.560710736 | 1.35045E-09 |
| SLCO1C1    | 1.560595189 | 1.14127E-07 |
| RSPO3      | 1.559221946 | 0.009830299 |
| TGFBR3     | 1.558692527 | 1.34535E-05 |
| ADAMTS15   | 1.558033371 | 3.43182E-05 |
| CA14       | 1.555809654 | 0.020147228 |
| MMP23B     | 1.555445781 | 4.03167E-07 |
| GPRASP1    | 1.555149057 | 1.18007E-10 |
| SYT6       | 1.555090553 | 0.024850572 |
| EFCAB12    | 1.553087616 | 2.75266E-06 |
| NCRNA00173 | 1.552962456 | 0.001376417 |
| SVEP1      | 1.552731383 | 6.06007E-09 |
| CSDC2      | 1.551209499 | 2.618E-07   |
| ZNF502     | 1.550737929 | 2.87898E-14 |
| ZNF540     | 1.550225283 | 2.28236E-13 |
| HCG22      | 1.549562553 | 4.39992E-05 |

|          |             |             |
|----------|-------------|-------------|
| ZNF214   | 1.549150259 | 5.72977E-12 |
| DMD      | 1.548451127 | 0.006477909 |
| DCLK1    | 1.548402052 | 0.012665361 |
| S1PR1    | 1.548203592 | 1.87089E-11 |
| ECT2L    | 1.547961091 | 0.017945417 |
| SLC19A3  | 1.547772574 | 0.01751402  |
| PCDP1    | 1.547019219 | 0.039750344 |
| MST1     | 1.546917235 | 8.06392E-09 |
| SPAG17   | 1.546262776 | 0.025941309 |
| RNF183   | 1.544819683 | 0.006679643 |
| GALNTL2  | 1.543390092 | 3.28618E-06 |
| SSC5D    | 1.543384867 | 1.0783E-08  |
| LEPR     | 1.543285198 | 4.33145E-08 |
| FAM189A2 | 1.543016018 | 3.23409E-06 |
| C1QTNF7  | 1.542977304 | 0.000844235 |
| OR2W3    | 1.542638591 | 0.000277164 |
| ZNF577   | 1.541649962 | 2.45813E-15 |
| CRB2     | 1.541313066 | 0.000301179 |
| NPR1     | 1.541226784 | 3.94214E-09 |
| SLC5A4   | 1.540676234 | 2.27719E-06 |
| RASSF6   | 1.539930255 | 0.021119554 |
| CAV1     | 1.539447144 | 2.30655E-11 |
| LGI4     | 1.537451402 | 4.57626E-07 |
| FAM159A  | 1.537391418 | 0.000138088 |
| CYR61    | 1.536635489 | 4.43384E-08 |
| MRGPRF   | 1.534301101 | 2.39745E-09 |
| STX1B    | 1.533679505 | 3.43609E-08 |
| DHH      | 1.533270915 | 1.90748E-07 |
| FAM182A  | 1.533187453 | 0.000869668 |
| RAPGEF3  | 1.532211388 | 4.73345E-15 |
| OR52N4   | 1.531808906 | 0.006020229 |
| CRB1     | 1.531035794 | 0.002529505 |
| CYP2B7P1 | 1.52997645  | 0.017566469 |
| ANKRD24  | 1.529383748 | 1.81984E-05 |
| ELMOD1   | 1.527737545 | 0.008485267 |
| PHYHIP   | 1.527474006 | 0.002495215 |
| GIPR     | 1.527329309 | 2.34042E-05 |
| BHMT2    | 1.526826374 | 6.13545E-05 |
| ZNF300P1 | 1.526407395 | 6.61211E-08 |
| PODN     | 1.525411481 | 1.54022E-10 |



|           |             |             |
|-----------|-------------|-------------|
| SEC14L2   | 1.524418442 | 0.00013815  |
| LOC283174 | 1.524348173 | 0.000881888 |
| AASS      | 1.524113418 | 4.67265E-15 |
| EMCN      | 1.521806288 | 5.63972E-12 |
| STC2      | 1.521176326 | 0.001780703 |
| MACROD2   | 1.521122886 | 0.037008408 |
| PGR       | 1.52048811  | 0.004140232 |
| PIK3C2G   | 1.520331264 | 0.028344557 |
| DUSP1     | 1.519886026 | 1.67283E-07 |
| SLC17A7   | 1.519252394 | 6.27292E-06 |
| SPATA18   | 1.517771366 | 1.99777E-06 |
| LRRC70    | 1.517441965 | 1.28077E-11 |
| CLUL1     | 1.516689318 | 6.46991E-05 |
| SLC43A1   | 1.515007982 | 7.7771E-08  |
| CLEC3B    | 1.514390469 | 1.58389E-06 |
| PRR16     | 1.514132366 | 0.001840265 |
| EDNRB     | 1.513724022 | 1.54731E-08 |
| TRIM74    | 1.513342029 | 0.002586479 |
| LRRC50    | 1.513230688 | 0.000239023 |
| NOVA1     | 1.512922376 | 0.013061829 |
| OSR1      | 1.512706025 | 0.033147734 |
| FAM149A   | 1.511543197 | 1.04289E-07 |
| CCDC141   | 1.51141884  | 0.010429079 |
| FAM38B    | 1.510415397 | 0.004485714 |
| DNAH6     | 1.509612711 | 0.008474531 |
| PDE2A     | 1.508786675 | 5.60345E-08 |
| BAI2      | 1.50747465  | 1.94247E-05 |
| SLC5A9    | 1.506877079 | 0.003163708 |
| TM4SF18   | 1.506795395 | 0.000404925 |
| KLHL13    | 1.5067507   | 0.002165388 |
| CH25H     | 1.50587258  | 8.06246E-06 |
| C10orf93  | 1.505109904 | 0.00016283  |
| CLEC10A   | 1.50469832  | 0.000734382 |
| NRIP2     | 1.502892869 | 1.1317E-15  |
| SPEF1     | 1.50219601  | 5.71338E-05 |
| CBX7      | 1.501583976 | 6.4328E-16  |
| LINC00924 | 1.501171532 | 1.19318E-06 |
| FAM66A    | 1.500804635 | 1.95626E-05 |
| TCEAL7    | 1.500624753 | 1.70331E-06 |
| EEF1DP3   | 1.500550194 | 5.61496E-05 |

|          |             |             |
|----------|-------------|-------------|
| LHFP     | 1.500314311 | 9.25857E-15 |
| MKI67    | 0.666414739 | 1.66499E-11 |
| PPFIA1   | 0.6658262   | 5.95011E-08 |
| FAM83B   | 0.665751832 | 0.000858882 |
| PFKP     | 0.665639017 | 3.55635E-06 |
| PRC1     | 0.665292774 | 2.13226E-11 |
| OIP5     | 0.665043386 | 3.64408E-14 |
| KIF4B    | 0.664982044 | 4.62001E-13 |
| ESPL1    | 0.664772354 | 2.06591E-12 |
| CLIC3    | 0.664026392 | 0.014215402 |
| HTR1D    | 0.662802824 | 0.005452098 |
| ERCC6L   | 0.662437059 | 6.81032E-14 |
| C3orf57  | 0.662354683 | 0.014113462 |
| SMIM5    | 0.662034004 | 0.001575874 |
| FAM72A   | 0.661712102 | 1.20201E-07 |
| ORC1L    | 0.660957927 | 2.86603E-08 |
| FAM171A2 | 0.660708536 | 0.000239225 |
| CDCA5    | 0.660609174 | 3.55825E-09 |
| NEIL3    | 0.660523693 | 2.37392E-10 |
| P2RY6    | 0.660430209 | 6.7355E-05  |
| GRB7     | 0.660333023 | 0.012425979 |
| EIF4EBP1 | 0.660167702 | 6.567E-05   |
| PTTG3P   | 0.659985537 | 1.82949E-05 |
| KIF4A    | 0.659523576 | 1.4424E-13  |
| E2F5     | 0.659375844 | 4.67472E-11 |
| ACOT11   | 0.65914577  | 0.001373509 |
| CDC25A   | 0.658438889 | 7.84386E-09 |
| RHBG     | 0.658213059 | 0.018068089 |
| ORC6L    | 0.657773187 | 2.97196E-09 |
| ME1      | 0.657401139 | 0.000466688 |
| KIAA1524 | 0.657400143 | 7.81969E-11 |
| CENPA    | 0.656776627 | 2.53369E-07 |
| FOXC1    | 0.656556977 | 0.024085608 |
| DEPDC1B  | 0.656527043 | 4.82146E-11 |
| MND1     | 0.656503009 | 2.03272E-07 |
| CDKL2    | 0.655929716 | 0.010813973 |
| NCAPG    | 0.655536526 | 2.9394E-13  |
| TK1      | 0.655190574 | 1.92853E-06 |
| NCAPH    | 0.654944624 | 4.83496E-13 |
| UBE2C    | 0.654191843 | 2.36428E-08 |

|           |             |             |
|-----------|-------------|-------------|
| CDC20     | 0.653860927 | 1.13328E-07 |
| KIF2C     | 0.653546114 | 7.47401E-09 |
| HPSE      | 0.65327069  | 3.76899E-09 |
| CDC6      | 0.652878257 | 0.005283417 |
| SKA1      | 0.652468098 | 1.05798E-08 |
| CDKN3     | 0.652388152 | 4.25514E-11 |
| NDC80     | 0.651771458 | 8.77692E-10 |
| MAD2L1    | 0.651495067 | 3.535E-13   |
| FA2H      | 0.651287218 | 0.005006416 |
| CKMT1A    | 0.651245878 | 0.000144495 |
| C17orf96  | 0.650949469 | 0.010640173 |
| SPTBN2    | 0.650159629 | 0.035930712 |
| NAP1L6    | 0.650126319 | 0.038178216 |
| CD24      | 0.650099881 | 0.000738362 |
| RAET1G    | 0.649424949 | 0.00678137  |
| FANCA     | 0.649206355 | 1.43856E-08 |
| CCNE2     | 0.647499538 | 1.0344E-07  |
| NME1      | 0.646648077 | 1.32886E-05 |
| E2F2      | 0.646207524 | 4.1258E-08  |
| GTSE1     | 0.646134727 | 1.3284E-11  |
| MYBL2     | 0.645888536 | 4.74623E-06 |
| ELOVL4    | 0.645781541 | 0.049164791 |
| PSMD12    | 0.645738912 | 7.06021E-18 |
| GBP5      | 0.645479021 | 0.010364701 |
| BLM       | 0.645476844 | 6.46808E-08 |
| ARHGAP11B | 0.645118177 | 9.27031E-11 |
| BMS1P20   | 0.644939801 | 0.025100722 |
| HIST1H3B  | 0.644922135 | 0.022232376 |
| MED1      | 0.644895411 | 0.000814179 |
| SCD       | 0.644367541 | 3.11013E-06 |
| TMEM171   | 0.643687633 | 0.036044982 |
| AURKB     | 0.643639229 | 1.19011E-08 |
| HCN2      | 0.643415711 | 0.033879839 |
| SLC16A10  | 0.642982914 | 0.002101803 |
| RAD51     | 0.642909879 | 9.1046E-17  |
| EME1      | 0.642809755 | 2.56893E-06 |
| IFI27     | 0.642397751 | 0.000558246 |
| TMEM52    | 0.64237577  | 0.000135218 |
| HJURP     | 0.642187651 | 6.5228E-13  |
| BDKRB1    | 0.64190349  | 6.97988E-07 |

|           |             |             |
|-----------|-------------|-------------|
| ZNF695    | 0.641476328 | 2.11829E-05 |
| GSG2      | 0.641215517 | 1.90586E-13 |
| CENPW     | 0.640850514 | 0.001378174 |
| SOX11     | 0.64054832  | 0.018318047 |
| KIF18B    | 0.640547239 | 2.02327E-10 |
| HIST1H2AJ | 0.640382836 | 0.000674181 |
| LILRA3    | 0.640378945 | 0.001446057 |
| IMPA2     | 0.640310935 | 4.41665E-06 |
| MELK      | 0.639859854 | 8.37617E-10 |
| FPR2      | 0.639354312 | 0.007708924 |
| HS6ST3    | 0.639244353 | 0.006872888 |
| ELOVL3    | 0.638696859 | 0.012282864 |
| LAD1      | 0.638526558 | 8.15265E-07 |
| SV2A      | 0.638521319 | 0.003721676 |
| PLCH1     | 0.637373683 | 2.05987E-05 |
| IL8       | 0.635767978 | 0.024664267 |
| CLTC      | 0.635011799 | 5.05792E-09 |
| SMC1B     | 0.63417214  | 0.022663153 |
| CDC45     | 0.633910447 | 3.19582E-12 |
| ULBP3     | 0.633500802 | 0.001486232 |
| SKA3      | 0.633307049 | 6.32254E-11 |
| DLGAP5    | 0.633102842 | 6.22764E-13 |
| USP32     | 0.631984667 | 8.3924E-07  |
| XK        | 0.631639484 | 0.000481269 |
| CENPE     | 0.631596413 | 1.38619E-14 |
| B3GNT3    | 0.63152681  | 0.004878131 |
| CELSR3    | 0.630854965 | 1.57963E-06 |
| MYBL1     | 0.630517398 | 9.29928E-05 |
| SHCBP1    | 0.62968796  | 7.57507E-15 |
| POLQ      | 0.629673334 | 3.36615E-14 |
| CCDC144C  | 0.629043982 | 0.02581364  |
| ITGA2B    | 0.628850796 | 0.002717094 |
| TPX2      | 0.628413688 | 8.35857E-14 |
| TOP2A     | 0.628201953 | 7.57946E-07 |
| HR        | 0.628019605 | 0.000108969 |
| RAPGEFL1  | 0.627942859 | 0.008560007 |
| CEP55     | 0.627443817 | 1.11195E-11 |
| CCNB2     | 0.626505003 | 6.89226E-13 |
| CLSPN     | 0.626409632 | 7.62914E-11 |
| TBX1      | 0.62638512  | 2.09138E-05 |

|           |             |             |
|-----------|-------------|-------------|
| ARHGAP11A | 0.626295864 | 3.38311E-16 |
| CENPI     | 0.62613643  | 5.67182E-14 |
| HIST1H1B  | 0.625553375 | 0.004564879 |
| APOBEC3A  | 0.625483922 | 0.000769237 |
| BUB1B     | 0.624545267 | 3.34744E-18 |
| PIR       | 0.624388185 | 2.5791E-06  |
| NOXO1     | 0.624144491 | 0.015575638 |
| CASC5     | 0.623610975 | 1.40264E-14 |
| PLK1      | 0.623560908 | 1.4424E-13  |
| PANX2     | 0.623104422 | 9.50049E-05 |
| CP        | 0.622391304 | 0.026292479 |
| KCNG3     | 0.622066049 | 0.000310915 |
| ERBB2     | 0.620819729 | 0.005328513 |
| RRM2      | 0.619945991 | 1.57218E-11 |
| SLC9A2    | 0.619182351 | 0.000617688 |
| SPAG5     | 0.618184114 | 1.4486E-11  |
| NPR3      | 0.61699767  | 0.008286453 |
| PADI2     | 0.616195917 | 0.000395357 |
| ARX       | 0.61569299  | 0.038411641 |
| DIAPH3    | 0.61514258  | 9.51108E-09 |
| ASPM      | 0.615012079 | 3.8969E-13  |
| CHAC1     | 0.614892141 | 7.4913E-06  |
| KIAA0319  | 0.614609877 | 0.018359424 |
| ANLN      | 0.61422049  | 1.57218E-11 |
| TMEM45A   | 0.613766614 | 0.001322567 |
| GPR156    | 0.613466247 | 0.006567929 |
| SGOL1     | 0.612804546 | 7.08961E-13 |
| CKAP2L    | 0.612335234 | 3.96962E-16 |
| CXCL11    | 0.610740295 | 0.001389152 |
| LRRC69    | 0.609707076 | 0.002925066 |
| BUB1      | 0.60910634  | 1.38462E-13 |
| PROM1     | 0.608565377 | 0.002101803 |
| GPR158    | 0.608305647 | 0.016662352 |
| PLAC2     | 0.608195309 | 9.09515E-06 |
| CDCA2     | 0.605433137 | 6.1966E-07  |
| DEPDC1    | 0.604428053 | 9.72249E-10 |
| MAP2      | 0.603784096 | 0.002433447 |
| HIST1H2AL | 0.603772761 | 7.69941E-05 |
| CBS       | 0.603237144 | 3.60018E-06 |
| SQLE      | 0.603041454 | 3.9016E-13  |

|          |             |             |
|----------|-------------|-------------|
| EXO1     | 0.602990889 | 1.15103E-13 |
| TTK      | 0.602237767 | 2.70598E-11 |
| EN1      | 0.601311235 | 0.0226572   |
| FAM54A   | 0.599290416 | 1.32323E-11 |
| CEACAM5  | 0.598121238 | 0.049432826 |
| BRIP1    | 0.597498608 | 1.30029E-12 |
| PSAT1    | 0.596966874 | 0.002859182 |
| MKRN3    | 0.596202562 | 0.000279303 |
| CLDN1    | 0.595434731 | 0.017413132 |
| KIF14    | 0.594292898 | 3.86443E-13 |
| GUCY1B2  | 0.593284023 | 0.000266614 |
| FBXW10   | 0.593273706 | 0.001759547 |
| KIAA1751 | 0.592265217 | 0.030257394 |
| CDCA7    | 0.592030804 | 6.17107E-06 |
| RAET1K   | 0.589660507 | 2.02252E-05 |
| CTSL2    | 0.589095648 | 0.003051175 |
| AURKA    | 0.588677125 | 1.96393E-14 |
| SLC22A20 | 0.58835881  | 0.007649737 |
| CKMT1B   | 0.588089493 | 7.90334E-07 |
| DSCC1    | 0.587963697 | 5.18818E-16 |
| PAH      | 0.587095477 | 0.025897665 |
| CCNA2    | 0.584900076 | 6.48242E-16 |
| CAPS     | 0.584691758 | 1.60903E-05 |
| TRPV3    | 0.584627959 | 0.015385712 |
| GBP6     | 0.583456921 | 0.040252086 |
| DLL3     | 0.583195147 | 0.039603794 |
| GJB3     | 0.582705232 | 0.038997716 |
| ATP1A3   | 0.58212495  | 0.037496038 |
| CYP3A5   | 0.581430702 | 0.018756794 |
| FAM131C  | 0.579497291 | 0.001972238 |
| EPR1     | 0.578560851 | 4.12549E-10 |
| B4GALNT1 | 0.578175586 | 0.000481494 |
| MMP7     | 0.577848114 | 0.04595728  |
| DKK1     | 0.577205695 | 0.027415169 |
| C15orf42 | 0.576365673 | 2.27681E-09 |
| CXCL10   | 0.575305335 | 0.001043204 |
| DQX1     | 0.575152044 | 0.000250167 |
| BIRC5    | 0.575099483 | 4.24004E-10 |
| RASGRF1  | 0.574829779 | 0.002348011 |
| MUC15    | 0.573158417 | 0.01824779  |

|           |             |             |
|-----------|-------------|-------------|
| SLITRK5   | 0.571444597 | 0.009798576 |
| FABP5     | 0.570002205 | 0.007588501 |
| FAM83D    | 0.569333127 | 1.02853E-13 |
| PKP1      | 0.568873923 | 0.011932785 |
| RDH10     | 0.568708785 | 0.008012465 |
| SLC6A11   | 0.56847873  | 0.000530037 |
| C21orf125 | 0.568085307 | 0.000954634 |
| ZP1       | 0.567528243 | 0.04955445  |
| NXPH4     | 0.566464619 | 0.006623503 |
| LHX2      | 0.565738806 | 0.015818693 |
| CBX2      | 0.565582137 | 8.56303E-09 |
| IGF2BP2   | 0.56466909  | 0.003501067 |
| PNPLA3    | 0.563656622 | 0.001804913 |
| LRP8      | 0.563331334 | 2.02884E-11 |
| HPDL      | 0.561573671 | 0.0004622   |
| COCH      | 0.559769549 | 0.003836217 |
| GDPD3     | 0.559652804 | 0.017900837 |
| E2F8      | 0.559153567 | 6.32358E-12 |
| ELF5      | 0.559104084 | 0.011216282 |
| SLC28A1   | 0.55903159  | 0.042934126 |
| DMBX1     | 0.557485778 | 0.000304479 |
| KPNA2     | 0.555604444 | 6.95437E-24 |
| ALG1L     | 0.554338165 | 2.96907E-05 |
| AQP9      | 0.553069097 | 1.6242E-05  |
| PCP4L1    | 0.553041296 | 0.040984971 |
| SLC17A9   | 0.552744245 | 3.47976E-05 |
| TDO2      | 0.55147354  | 0.001106851 |
| GPR126    | 0.550747593 | 1.33898E-07 |
| ZIC2      | 0.550073208 | 5.00792E-05 |
| DHRS2     | 0.548268425 | 0.038444322 |
| CCL8      | 0.548117182 | 3.61264E-05 |
| RGS20     | 0.547278898 | 0.027544533 |
| CYP4F3    | 0.544640202 | 0.02459809  |
| CCNE1     | 0.542512439 | 0.001552429 |
| SFTPA2    | 0.542499823 | 0.010790129 |
| CHRNA4    | 0.542462197 | 0.016601633 |
| ULBP2     | 0.540712599 | 5.73383E-05 |
| SLC7A5    | 0.538494396 | 6.88866E-06 |
| FOXD1     | 0.537414849 | 0.000763028 |
| MMP1      | 0.537149413 | 0.005192649 |

|           |             |             |
|-----------|-------------|-------------|
| CECR2     | 0.534830305 | 6.4744E-07  |
| DLX6      | 0.534217048 | 0.047580239 |
| DNAH11    | 0.53333688  | 0.018602457 |
| PPARGC1A  | 0.533142671 | 0.033895502 |
| C17orf104 | 0.532713312 | 0.004198721 |
| IGF2BP3   | 0.532548603 | 0.037759328 |
| DLX4      | 0.530933498 | 2.67981E-06 |
| CHODL     | 0.530300394 | 0.01482932  |
| KLRG2     | 0.526327445 | 7.8462E-07  |
| CHRNA5    | 0.525972258 | 8.1936E-10  |
| C10orf91  | 0.52573331  | 0.004111597 |
| CALML5    | 0.524557336 | 0.003269837 |
| MCM10     | 0.523821527 | 7.29972E-13 |
| B3GNT7    | 0.521992642 | 0.008926533 |
| S100P     | 0.519798162 | 0.000366336 |
| PPP1R14C  | 0.519545017 | 0.004185692 |
| KLK8      | 0.518046455 | 0.037327797 |
| RSPO4     | 0.514658231 | 0.008084398 |
| C1orf106  | 0.513758093 | 5.18668E-08 |
| NPW       | 0.513609887 | 0.032828698 |
| TMEM64    | 0.511853785 | 0.010790129 |
| GABRP     | 0.510652932 | 0.001886991 |
| NCCRP1    | 0.510065494 | 0.011714262 |
| TPRXL     | 0.508608563 | 0.00908553  |
| DDN       | 0.503427355 | 0.012274237 |
| CWH43     | 0.499020837 | 0.03008553  |
| ATP6V0A4  | 0.497946763 | 0.000160877 |
| MUC16     | 0.496719106 | 0.003747254 |
| APOBEC3B  | 0.49610433  | 1.35042E-07 |
| COL22A1   | 0.495702074 | 0.010465089 |
| ACSL6     | 0.495688212 | 0.006378147 |
| LCTL      | 0.494020643 | 0.036391357 |
| GPX2      | 0.484811614 | 0.011283202 |
| GAL       | 0.484565166 | 0.001834288 |
| TMPRSS4   | 0.481851555 | 0.008189799 |
| ULBP1     | 0.477530208 | 6.55888E-07 |
| CRLF1     | 0.474151521 | 0.041734654 |
| BAIAP2L2  | 0.466694935 | 0.001818486 |
| IYD       | 0.460560304 | 0.006896998 |
| ANKRD34B  | 0.456566071 | 0.021544488 |



|          |             |             |
|----------|-------------|-------------|
| KLHDC7B  | 0.455354452 | 0.014634128 |
| HOXB9    | 0.45512983  | 0.033351083 |
| PGBD5    | 0.453391254 | 0.000207171 |
| ONECUT2  | 0.452636304 | 0.000125697 |
| SLC6A15  | 0.440461911 | 0.03716639  |
| DIRAS2   | 0.436743233 | 0.01997368  |
| LCT      | 0.433733249 | 0.002838823 |
| VGLL1    | 0.431153733 | 0.026821714 |
| SERPINB2 | 0.42780741  | 0.047026575 |
| TNIP3    | 0.427409192 | 0.012204143 |
| MT1H     | 0.422777755 | 0.008375341 |
| DMRTA1   | 0.417911816 | 0.000214342 |
| SLC6A14  | 0.41701213  | 0.044514944 |
| FAM83A   | 0.402966829 | 0.002841903 |
| PRAME    | 0.392253199 | 2.30197E-06 |
| C1orf186 | 0.386453771 | 0.008474352 |
| GSDMC    | 0.384519764 | 0.00021888  |
| WNT3A    | 0.37604418  | 0.009895588 |
| RASGEF1C | 0.374268838 | 0.008272486 |
| CEACAM7  | 0.370393775 | 0.049969295 |
| DUSP9    | 0.370278783 | 0.000350862 |
| DSG3     | 0.370048039 | 0.002450702 |
| KRT16    | 0.364673838 | 0.015146936 |
| PRR11    | 0.361882564 | 0.01003788  |
| KCNG1    | 0.358043108 | 0.008816362 |
| WDR72    | 0.356320604 | 0.030275519 |
| KCNK9    | 0.353467219 | 0.01629245  |
| GDPD2    | 0.352253034 | 0.013169055 |
| MATN4    | 0.348927417 | 0.042229763 |
| AKR1B10  | 0.346289863 | 0.005238294 |
| KRT81    | 0.345064452 | 0.001985938 |
| CCL7     | 0.340600948 | 5.38949E-06 |
| SLC15A1  | 0.32382801  | 0.039864341 |
| CELF3    | 0.293745567 | 0.037799841 |
| C6orf15  | 0.289811431 | 0.021119554 |
| CHD5     | 0.28924947  | 0.034602012 |
| NRAD1    | 0.28904838  | 0.004749939 |
| ABP1     | 0.277372914 | 0.014086818 |
| PSORS1C2 | 0.254593402 | 0.02995255  |
| LASS3    | 0.237050096 | 0.043958065 |

|        |             |             |
|--------|-------------|-------------|
| ACTL8  | 0.177612122 | 0.000490876 |
| CRISP3 | 0.104141806 | 0.007507755 |
| MAGEA8 | 0.097125143 | 0.044307011 |

---

**Supplementary Table S3. Genes in the *ZNF582-AS1* methylation signature**

| <b>Gene symbol</b> | <b>Fold change</b> | <b>Adjusted p value</b> |
|--------------------|--------------------|-------------------------|
| DLX4               | 2.001458112        | 0.0169723               |
| CHRNA5             | 1.731670233        | 0.007555658             |
| B4GALNT1           | 1.642542881        | 0.042161372             |
| ETV4               | 1.630874315        | 0.022127598             |
| PIF1               | 1.605762561        | 0.039508544             |
| CNIH2              | 1.600911277        | 0.042740036             |
| CBS                | 1.578019275        | 0.044556023             |
| SLC26A10           | 1.544203015        | 0.03292953              |
| EPR1               | 1.521123884        | 0.006982047             |
| CELSR3             | 1.510186313        | 0.033927392             |
| BDKRB1             | 1.500947723        | 0.014318591             |
| FAM81A             | 1.481057253        | 0.041407244             |
| CCNE2              | 1.473889553        | 0.009457659             |
| MURC               | 1.4698396          | 0.021028916             |
| CDKN2BAS           | 1.468679137        | 0.044556023             |
| ACCN2              | 1.464247741        | 0.02448453              |
| BRIP1              | 1.456852392        | 0.011039893             |
| UHRF1              | 1.446663456        | 0.001130333             |
| CDCA5              | 1.429790104        | 0.019923311             |
| MELK               | 1.420846512        | 0.017592968             |
| EME1               | 1.417283659        | 0.035429907             |
| C18orf56           | 1.415154922        | 0.027428984             |
| TYMS               | 1.413976474        | 0.014340796             |
| C15orf42           | 1.413298763        | 0.028702757             |
| CDC7               | 1.409143594        | 0.006582365             |
| SPAG5              | 1.408975299        | 0.011039893             |
| SKA3               | 1.402221556        | 0.025292164             |
| ORAOV1             | 1.400352449        | 0.025486382             |
| CDT1               | 1.396174833        | 0.011936026             |
| RAD54L             | 1.389923602        | 0.021028916             |
| AURKB              | 1.380627053        | 0.049882389             |
| CDKN3              | 1.370621975        | 0.027772811             |
| PTRH2              | 1.370432623        | 0.00756483              |
| GTSE1              | 1.366722388        | 0.013693698             |
| RHEBL1             | 1.36588215         | 0.011936026             |
| GIN52              | 1.358506543        | 0.014318591             |
| KIF2C              | 1.355911605        | 0.037526789             |
| CHAF1B             | 1.355646503        | 0.00425459              |
| E2F1               | 1.354865883        | 0.017592968             |
| RRM2               | 1.353620028        | 0.045660908             |

|          |             |             |
|----------|-------------|-------------|
| CDC45    | 1.351394224 | 0.0169723   |
| EZH2     | 1.346944149 | 0.023564678 |
| KIF18B   | 1.343984538 | 0.035327167 |
| KPNA2    | 1.341763296 | 0.008257094 |
| TUBD1    | 1.335573034 | 0.006582365 |
| CCNB2    | 1.333186692 | 0.019923311 |
| DDIT3    | 1.330865171 | 0.0169723   |
| WDR62    | 1.323962633 | 0.027653933 |
| PPP2R3B  | 1.323798822 | 0.011690184 |
| TMEM49   | 1.323475268 | 0.018809447 |
| SKA2     | 1.318208002 | 0.026454098 |
| DONSON   | 1.317851377 | 0.008257094 |
| PLCXD1   | 1.316027106 | 0.021028916 |
| PPM1D    | 1.313083996 | 0.048131804 |
| OIP5     | 1.303406848 | 0.017592968 |
| TYRO3    | 1.30229723  | 0.013693698 |
| KIF4A    | 1.301172003 | 0.029954845 |
| CLTC     | 1.299102131 | 0.038305741 |
| THOC4    | 1.297726982 | 0.011039893 |
| RAD51    | 1.29733777  | 0.013080367 |
| HJURP    | 1.295305415 | 0.040649611 |
| CENPN    | 1.294078017 | 0.038305741 |
| PSMD12   | 1.294032288 | 0.003994498 |
| CENPK    | 1.29177347  | 0.029954845 |
| POLQ     | 1.288408105 | 0.048227955 |
| DDX39    | 1.287687293 | 0.006982047 |
| NCAPG    | 1.28699036  | 0.035429907 |
| MCM2     | 1.285510301 | 0.028490482 |
| CENPE    | 1.284188441 | 0.045766351 |
| MLF1IP   | 1.276600908 | 0.014383982 |
| BUB1B    | 1.27218722  | 0.033359675 |
| CTPS     | 1.269524362 | 0.037526789 |
| METTTL2A | 1.269346924 | 0.004323018 |
| RAD51C   | 1.265567282 | 0.014997385 |
| C8orf38  | 1.25784278  | 0.040649611 |
| NUP85    | 1.256531393 | 0.001055254 |
| INTS2    | 1.254462217 | 0.03292953  |
| NOL11    | 1.25411105  | 0.00301687  |
| ASF1B    | 1.252018254 | 0.036480861 |
| GALK1    | 1.250534694 | 0.014383982 |
| MYO19    | 1.249278676 | 0.021028916 |
| RPS6KB2  | 1.247425635 | 0.013693698 |
| SNRPA1   | 1.247319187 | 0.019564492 |

|           |             |             |
|-----------|-------------|-------------|
| CYB561    | 1.243636954 | 0.043915596 |
| TACO1     | 1.241467993 | 0.008257094 |
| SLC25A19  | 1.236452437 | 0.019332462 |
| SLC4A5    | 1.236323454 | 0.011608521 |
| TRIM37    | 1.235406661 | 0.043100118 |
| C16orf61  | 1.235352686 | 0.01776313  |
| MCM6      | 1.233988347 | 0.014997385 |
| CHAF1A    | 1.232784883 | 0.01928333  |
| PSMC5     | 1.232762769 | 0.044176381 |
| DHX40     | 1.229154475 | 0.045660908 |
| IDI2      | 1.228807768 | 0.021802063 |
| CCDC45    | 1.226933228 | 0.011039893 |
| LMNB1     | 1.226741754 | 0.038809852 |
| ECT2      | 1.225403274 | 0.041407244 |
| ICT1      | 1.224463674 | 0.044556023 |
| WDHD1     | 1.222537625 | 0.041407244 |
| ZCCHC11   | 1.222424725 | 0.038809852 |
| FANCL     | 1.221342157 | 0.042538282 |
| AMZ2P1    | 1.219487853 | 0.029954845 |
| FAM100B   | 1.218296287 | 0.040314929 |
| AMZ2      | 1.216395576 | 0.007857713 |
| TLK2      | 1.215304028 | 0.007205267 |
| RPUSD3    | 1.213982394 | 0.038305741 |
| MRPS23    | 1.213129453 | 0.019923311 |
| CCDC137   | 1.212362452 | 0.037526789 |
| LOC146880 | 1.211967758 | 0.006982047 |
| MXD3      | 1.211173535 | 0.045766351 |
| MTHFD2    | 1.207933377 | 0.035268512 |
| WDR76     | 1.206870716 | 0.042207715 |
| CYB5D1    | 0.833062861 | 0.042896734 |
| SIK3      | 0.832976989 | 0.036524081 |
| SPATA6    | 0.831691943 | 0.048324368 |
| KLHL5     | 0.819666279 | 0.036807217 |
| GPD1L     | 0.819500782 | 0.036416349 |
| TNK1      | 0.818761621 | 0.027056068 |
| IFT46     | 0.815780586 | 0.011039893 |
| ZNF167    | 0.815031021 | 0.027617227 |
| STARD13   | 0.81472732  | 0.029511339 |
| SLC30A1   | 0.812386589 | 0.045660908 |
| IQCK      | 0.812166378 | 0.014383982 |
| DIXDC1    | 0.81077698  | 0.010416232 |
| ZNF577    | 0.810406005 | 0.038809852 |
| ZNF717    | 0.805027533 | 0.012751427 |

|          |             |             |
|----------|-------------|-------------|
| CISH     | 0.804502381 | 0.040912442 |
| EIF4E3   | 0.801324493 | 0.001055254 |
| C17orf97 | 0.79920587  | 0.038305741 |
| ZNF470   | 0.795464064 | 0.001358453 |
| ZFP28    | 0.795398786 | 0.001055254 |
| FDXACB1  | 0.794177769 | 0.00301687  |
| MAP3K1   | 0.792460642 | 0.04773522  |
| FRY      | 0.79023967  | 0.042774728 |
| BTRC     | 0.7888527   | 0.019564492 |
| RORC     | 0.786756555 | 0.038305741 |
| ZNF626   | 0.786587851 | 0.026454098 |
| ZNF583   | 0.784811868 | 2.49097E-05 |
| C14orf45 | 0.782010607 | 0.020733852 |
| ZSCAN18  | 0.778632932 | 0.006582365 |
| ZNF502   | 0.777098168 | 0.027617227 |
| TTC12    | 0.76637057  | 0.004973296 |
| ARMCX1   | 0.763416962 | 0.045289603 |
| SGK223   | 0.759551314 | 0.043385438 |
| VWA5A    | 0.755728103 | 0.04773522  |
| SIAE     | 0.755328114 | 0.007727415 |
| HPN      | 0.754026976 | 0.037570163 |
| TMEM25   | 0.746392445 | 0.004542686 |
| ZNF285   | 0.743610792 | 0.006796562 |
| IQGAP2   | 0.732529684 | 0.040558706 |
| PDE6B    | 0.731747593 | 0.014318591 |
| COL4A5   | 0.727230898 | 0.040314929 |
| UBXN10   | 0.722253484 | 0.030172337 |
| KIF13B   | 0.722168188 | 0.011039893 |
| ABCA3    | 0.721141487 | 0.011690184 |
| ZNF471   | 0.718712678 | 0.007205267 |
| MUC1     | 0.717467985 | 0.041784994 |
| ZNF677   | 0.708672844 | 0.011690184 |
| NOSTRIN  | 0.706731126 | 0.019564492 |
| DYNC2H1  | 0.706406259 | 0.004583512 |
| C4A      | 0.704987882 | 0.042321625 |
| ZNF542   | 0.698561344 | 8.28867E-11 |
| CACNA1D  | 0.698244097 | 0.024271991 |
| RAI2     | 0.679138095 | 0.011936026 |
| WNT5A    | 0.671563112 | 0.016068152 |
| ABAT     | 0.666558726 | 0.012193158 |
| PTPRT    | 0.624565861 | 0.045766351 |
| ZNF582   | 0.607994039 | 1.02695E-19 |
| ZNF238   | 0.607342697 | 0.009851137 |

|        |             |             |
|--------|-------------|-------------|
| NXNL2  | 0.599486144 | 0.027653933 |
| IGFALS | 0.443953084 | 0.011690184 |

---

**Supplementary Table S4. Correlations between *ZNF582-AS1* expression and DNA methylation in the *ZNF582-AS1* promoter 13 CpG sites**

| <b>CpG site</b> | <b>Spearman's correlation</b> | <b>P value</b>  |
|-----------------|-------------------------------|-----------------|
| cg01772700      | -0.197                        | <b>1.59E-05</b> |
| cg24733179      | -0.339                        | <b>3.9E-14</b>  |
| cg11740878      | -0.257                        | <b>1.5E-08</b>  |
| cg09568464      | -0.443                        | <b>4.55E-24</b> |
| cg02763101      | -0.384                        | <b>4.8E-18</b>  |
| cg22647407      | -0.333                        | <b>1.05E-13</b> |
| cg08464824      | -0.361                        | <b>5.91E-16</b> |
| cg13916740      | -0.351                        | <b>3.63E-15</b> |
| cg24039631      | -0.304                        | <b>1.51E-11</b> |
| cg20984085      | -0.38                         | <b>1.28E-17</b> |
| cg25267765      | -0.437                        | <b>2.05E-23</b> |
| cg07135042      | -0.453                        | <b>3.17E-25</b> |
| cg07778983      | -0.091                        | 0.047715        |



**Supplementary Table S5. Predicted miRNA targets on the *ZNF582-AS1* transcripts**

| <b>miRNA name</b> | <b>Binding site types in different <i>ZNF582-AS1</i> transcripts</b> | <b>Positions in <i>ZNF582-AS1</i> transcripts</b> | <b>Fold change in expression</b> | <b>Adjusted p value</b> |
|-------------------|----------------------------------------------------------------------|---------------------------------------------------|----------------------------------|-------------------------|
| hsa-miR-130b-5p   | ENST00000585659 (variant 2)                                          |                                                   | 0.774                            | 0.014                   |
|                   | 7mer                                                                 | 493-510                                           |                                  |                         |
|                   | 6mer                                                                 | 1191-1215                                         |                                  |                         |
|                   | 6mer                                                                 | 282-299                                           |                                  |                         |
| hsa-miR-590-5p    | ENST00000587979 (variant 1)                                          |                                                   | 0.730                            | 5.16E-05                |
|                   | 8mer                                                                 | 1233-1242                                         |                                  |                         |
|                   | 7mer                                                                 | 1294-1303                                         |                                  |                         |
|                   | ENST00000585659 (variant 2)                                          |                                                   |                                  |                         |
|                   | 8mer                                                                 | 1222-1231                                         |                                  |                         |
|                   | 7mer                                                                 | 1283-1292                                         |                                  |                         |
| hsa-miR-627-3p    | ENST00000587979 (variant 1)                                          |                                                   | 0.825                            | 0.012                   |
|                   | 8mer                                                                 | 908-928                                           |                                  |                         |
|                   | 8mer                                                                 | 764-781                                           |                                  |                         |
|                   | 6mer                                                                 | 1170-1192                                         |                                  |                         |
|                   | ENST00000585659 (variant 2)                                          |                                                   |                                  |                         |
|                   | 8mer                                                                 | 491-516                                           |                                  |                         |
|                   | 8mer                                                                 | 897-917                                           |                                  |                         |
|                   | 8mer                                                                 | 753-770                                           |                                  |                         |
|                   | 6mer                                                                 | 1159-1181                                         |                                  |                         |
|                   | 7mer                                                                 | 536-547                                           |                                  |                         |
| hsa-miR-939-3p    | ENST00000587979 (variant 1)                                          |                                                   | 0.735                            | 1.26E-04                |
|                   | 7mer                                                                 | 1460-1481                                         |                                  |                         |
|                   | 7mer                                                                 | 551-573                                           |                                  |                         |
|                   | 6mer                                                                 | 1308-1331                                         |                                  |                         |
|                   | 6mer                                                                 | 801-821                                           |                                  |                         |
|                   | ENST00000585659 (variant 2)                                          |                                                   |                                  |                         |
|                   | 7mer                                                                 | 1449-1470                                         |                                  |                         |
|                   | 7mer                                                                 | 312-334                                           |                                  |                         |
|                   | 6mer                                                                 | 1297-1320                                         |                                  |                         |
|                   | 6mer                                                                 | 790-810                                           |                                  |                         |
|                   | ENST00000589888 (variant 3)                                          |                                                   |                                  |                         |
|                   | 7mer                                                                 | 1128-1149                                         |                                  |                         |
|                   | 7mer                                                                 | 729-751                                           |                                  |                         |
|                   | 6mer                                                                 | 979-999                                           |                                  |                         |
| hsa-miR-940       | ENST00000587979 (variant 1)                                          |                                                   | 0.719                            | 0.011                   |
|                   | 7mer                                                                 | 1594-1600                                         |                                  |                         |
|                   | 7mer                                                                 | 1435-1460                                         |                                  |                         |
|                   | 6mer                                                                 | 973-999                                           |                                  |                         |

|                 |                             |           |       |          |
|-----------------|-----------------------------|-----------|-------|----------|
|                 | 6mer                        | 1545-1551 |       |          |
|                 | ENST00000585659 (variant 2) |           |       |          |
|                 | 7mer                        | 1583-1589 |       |          |
|                 | 7mer                        | 1424-1449 |       |          |
|                 | 6mer                        | 962-988   |       |          |
|                 | 6mer                        | 1534-1540 |       |          |
|                 | ENST00000589888 (variant 3) |           |       |          |
|                 | 7mer                        | 1262-1268 |       |          |
|                 | 7mer                        | 1103-1128 |       |          |
|                 | 6mer                        | 1213-1219 |       |          |
| hsa-miR-3682-3p | ENST00000587979 (variant 1) |           | 0.766 | 0.005    |
|                 | 8mer                        | 1374-1390 |       |          |
|                 | 8mer                        | 1399-1414 |       |          |
|                 | ENST00000585659 (variant 2) |           |       |          |
|                 | 8mer                        | 1363-1379 |       |          |
|                 | 8mer                        | 1388-1403 |       |          |
|                 | ENST00000589888 (variant 3) |           |       |          |
|                 | 8mer                        | 1042-1058 |       |          |
|                 | 8mer                        | 1067-1082 |       |          |
| hsa-miR-4746-5p | ENST00000587979 (variant 1) |           | 0.681 | 5.42E-05 |
|                 | 8mer                        | 166-185   |       |          |
|                 | 6mer                        | 716-734   |       |          |
|                 | ENST00000585659 (variant 2) |           |       |          |
|                 | 8mer                        | 152-171   |       |          |
|                 | 6mer                        | 699-723   |       |          |
|                 | ENST00000589888 (variant 3) |           |       |          |
|                 | 8mer                        | 181-200   |       |          |
|                 | 6mer                        | 894-912   |       |          |

**Supplementary Table S6. Predicted transcription factors for *ZNF582-AS1***

| <b>Transcription Factors</b> | <b>TSS position of ZNF582-AS1</b> | <b>Binding Site Start</b> | <b>Binding Site End</b> | <b>Cell lines</b> | <b>Reference description</b>        |
|------------------------------|-----------------------------------|---------------------------|-------------------------|-------------------|-------------------------------------|
| CTCF                         | chr19:56393655                    | chr19:56393109            | chr19:56393646          | MCF7              | Schmidt D, et al. Genome Res 2010   |
| KDM5B                        | chr19:56393655                    | chr19:56393448            | chr19:56393572          | T-47D             | Yamamoto S, et al. Cancer Cell 2014 |
|                              | chr19:56393655                    | chr19:56393254            | chr19:56393354          | T-47D             | Yamamoto S, et al. Cancer Cell 2014 |
| HIF1A                        | chr19:56393655                    | chr19:56393150            | chr19:56393909          | T-47D             | Zhang J, et al. EMBO J 2015         |
| ARNT                         | chr19:56393655                    | chr19:56393174            | chr19:56393888          | T-47D             | Zhang J, et al. EMBO J 2015         |
| NRF1                         | chr19:56393655                    | chr19:56393152            | chr19:56393920          | T-47D             | Zhang J, et al. EMBO J 2015         |
